# Supplementary material
Source: publisher site journal article supplement (https://www.dovepress.com/get_supplementary_file.php?f=445646.docx)
Supplement: Supplementary file 1 [file get_supplementary_file.php]

**Table S1. Patient-reported outcomes measures for evaluation of AA signs and symptoms**

|  | **Scalp hair assessment PRO**™**19** | **PRO measure for eyebrow hair loss**™**20** | **PRO measure for eyelash hair loss**™**20** | **PRO measure for eye irritation**™**20** | **PRO measure for nail appearance**™**20** | **PRO measures for stubble/beard and body hair loss** |
| --- | --- | --- | --- | --- | --- | --- |
| **Participant instructions** | Use mirrors to look at your entire scalp.  Please rate the total area of your scalp that is missing hair right now. Areas of vellus hair (peach fuzz or baby hair) should also be considered as missing hair | Rate eyebrows as they look today.  Answer based on the most bothersome type of hair loss if both thinning and gaps are present | Rate eyelashes as they look today | Rate how irritated (e.g., itching, stinging, burning, or dry) either eyes have been in the past 7 days | Examine fingernails and toenails for damaged (e.g., pitted, rough, brittle, or split) as they look today | Have you had any hair loss with your Alopecia Areata in the following areas? Stubble/beard hair  Body hair- including intimate body hair (please exclude scalp, eyelash, and eyebrows from this assessment) |
| **Score** |  |  |  |  |  |  |
| **0** | No missing hair (0% of my scalp is missing hair; I have a full head of hair) | Full eyebrows on each eye | Full eyelashes on each eyelid | No irritation | Not at all damaged | No – No hair loss in this area with my AA |
| **1** | A limited area (1–20% of my scalp is missing hair) | Minimal gap(s) or minimal amount of thinning in at least one eyebrow | Minimal gap(s) along the eyelids | A little irritated | A little damage to at least one nail | Yes – A small amount of hair loss in this area with my AA |
| **2** | A moderate area (21–49% of my scalp is missing hair) | Large gap(s) or large amount of thinning in at least one eyebrow | Large gap(s) along the eyelids | Moderately irritated | Moderate damage to at least one nail | Yes – A moderate amount of hair loss in this area with my AA |
| **3** | A large area (50–94% of my scalp is missing hair) | No or barely any eyebrow hairs | No or barely any eyelash hair | Severely irritated | Significant damage to, or loss of, at least one nail | Yes – A large amount of hair loss in this area with my AA |
| **4** | Nearly all or all (95–100% of my scalp is missing hair) |  |  |  |  | Yes – I’ve lost all of my hair in this area with my AA |

**Abbreviations:** AA, alopecia areata; PRO, patient-reported outcome.

**Table S2. Demographics and clinical characteristics in subgroups of adults with AA**

|  | **Current age (years)** | | | **Sex** | | **Duration since diagnosis (years)** | | | **Current scalp hair loss (%)a** | | |
| --- | --- | --- | --- | --- | --- | --- | --- | --- | --- | --- | --- |
| **≤40 n=254** | **41–50 n=334** | **>50**  **n=159** | **Female**  **n=413** | **Male**  **n=304** | **<2**  **n=182** | **2–4**  **n=313** | **>4**  **n=252** | **<50%**  **n=94** | **50–94%**  **n=348** | **≥95%**  **n=305** |
| **Demographics** | | | | | | | | | | | |
| Mean (SD) age, years | 36.6 (3.6) | 44.5 (2.8) | 53.9 (3.4) | 44.5 (7.6) | 43.1 (6.3) | 43.0 (6.4) | 43.0 (6.3) | 45.5 (8.0) | 41.8 (8.0) | 45.4 (6.9) | 42.7 (6.5) |
| Sex, n (%) |  |  |  |  |  |  |  |  |  |  |  |
| Female | 138 (54.3) | 156 (46.7) | 119 (74.8) | 413 (100) | n/a | 82 (45.1) | 187 (59.7) | 144 (57.1) | 37 (39.4) | 186 (53.4) | 190 (62.3) |
| Male | 102 (40.2) | 163 (48.8) | 39 (24.5) | n/a | 304 (100) | 71 (39.0) | 125 (39.9) | 108 (42.9) | 54 (57.4) | 146 (42.0) | 104 (34.1) |
| Ethnicity, n (%) |  |  |  |  |  |  |  |  |  |  |  |
| White/Caucasian | 123 (48.4) | 168 (50.3) | 55 (34.6) | 178 (43.1) | 156 (51.3) | 95 (52.2) | 145 (46.3) | 106 (42.1) | 42 (44.7) | 151 (43.4) | 153 (50.2) |
| Asian (South/East) | 89 (35.0) | 96 (28.7) | 92 (57.9) | 161 (39.0) | 107 (35.2) | 47 (25.8) | 120 (38.3) | 110 (43.7) | 43 (45.7) | 150 (43.1) | 84 (27.5) |
| Hair color, n (%) |  |  |  |  |  |  |  |  |  |  |  |
| Black | 142 (55.9) | 173 (51.8) | 104 (65.4) | 266 (64.4) | 144 (47.4) | 79 (43.4) | 197 (62.9) | 143 (56.8) | 56 (59.6) | 178 (51.2) | 185 (60.7) |
| Brown (dark, mid, light) | 76 (29.9) | 125 (37.4) | 40 (25.2) | 110 (26.6) | 111 (36.5) | 84 (46.2) | 74 (23.6) | 83 (32.9) | 32 (34.0) | 133 (38.2) | 76 (24.9) |
| **Clinical characteristics** | | | | | | | | | | | |
| Mean time since AA diagnosis, years (SD) | 5.1 (6.9) | 4.3 (5.4) | 5.5 (7.2) | 5.2 (7.2) | 4.7 (5.3) | 1.3 (0.5) | 2.9 (0.6) | 9.7 (9.0) | 4.2 (3.5) | 5.5 (7.3) | 4.3 (5.8) |
| Current signs & symptoms, n (%) |  |  |  |  |  |  |  |  |  |  |  |
| Scalp hair loss (≥50%)a | 211 (83.1) | 296 (88.6) | 146 (91.8) | 376 (91.0) | 250 (82.2) | 165 (90.7) | 264 (84.3) | 224 (88.9) | 0 | 348 (100) | 305 (100) |
| Eyebrow hair loss (score ≥2)b | 93 (36.6) | 155 (46.4) | 102 (64.2 | 206 (49.9) | 138 (45.4) | 60 (33.0) | 142 (45.4) | 148 (58.7) | 34 (36.2) | 179 (51.4 | 137 (44.9) |
| Eyelash hair loss (score ≥2)b | 89 (35.0) | 176 (52.7) | 99 (62.3) | 215 (52.1) | 143 (47.0) | 72 (39.6) | 145 (46.3) | 147 (58.3) | 40 (42.6) | 178 (51.1) | 146 (47.9) |
| Beard hair loss (score ≥2)c,d | 48 (44.9) | 119 (71.7) | 25 (64.1) | 0 | 188 (61.8) | 46 (58.9) | 76 (60.3) | 70 (64.8) | 37 (66.1) | 97 (64.7) | 58 (54.7) |
| Body hair loss (score ≥2)d | 163 (64.2) | 244 (73.1) | 140 (88.1) | 336 (81.4) | 195 (64.1) | 126 (69.2) | 233 (74.4) | 188 (74.6) | 63 (67.0) | 268 (77.0) | 216 (70.8) |
| Eye irritation (score ≥2)e | 98 (38.6) | 158 (47.3) | 79 (49.7) | 206 (49.9) | 123 (40.5) | 64 (35.2) | 133 (42.5) | 138 (54.8) | 28 (29.8) | 152 (43.7) | 155 (50.8) |
| Nail damage (score ≥2)f | 81 (31.9) | 149 (44.6) | 82 (51.6) | 195 (47.2) | 112 (36.8) | 63 (34.6) | 117 (37.4) | 132 (52.4) | 29 (30.9) | 154 (44.3) | 129 (42.3) |
| Psychological diagnoses, n (%) |  |  |  |  |  |  |  |  |  |  |  |
| Anxiety | 99 (39.0) | 75 (22.5) | 21 (13.2) | 87 (21.1) | 92 (30.3) | 80 (44.0) | 64 (20.5) | 51 (20.2) | 32 (34.0) | 96 (27.6) | 67 (22.0) |
| Depression | 66 (26.0) | 57 (17.1) | 12 (7.6) | 70 (17.0) | 60 (19.7) | 43 (23.6) | 39 (12.5) | 53 (21.0) | 20 (21.3) | 66 (19.0) | 49 (16.1) |
| Sleep problems | 94 (37.0) | 96 (28.7) | 20 (12.6) | 106 (25.7) | 87 (28.6) | 70 (38.5) | 89 (28.4) | 51 (20.2) | 24 (25.5) | 88 (25.3) | 98 (32.1) |

**Notes:** aAll participants with current scalp hair loss <50% reported a previous scalp hair loss ≥50%. %. bScores ≥2 for eyebrow/eyelash hair = large gaps/large amount of thinning or no or barely any hair = moderate to severe. c n=312. dScores ≥2 for stubble/beard/body hair loss = moderate to large amount of hair loss or loss of all hair in this area = moderate to severe. eScores ≥2 for eye irritation = moderate or severe irritation including itching, stinging, burning, or dryness. fScores ≥2 for nail damage = moderate to significant damage to fingernails or toenails.

**Abbreviations:** AA, alopecia areata; n/a, not applicable; SD, standard deviation.

**Table S3. Disease burden and psychosocial impact in subgroups of adults with AA**

|  | **Current age (years)** | | | **Sex** | | **Duration since diagnosis (years)** | | | **Current scalp hair loss (%)a** | | |
| --- | --- | --- | --- | --- | --- | --- | --- | --- | --- | --- | --- |
|  | **≤40** | **41–50** | **>50** | **Female** | **Male** | **<2** | **2–4** | **>4** | **<50%** | **50–94%** | **≥95%** |
| **DLQI** | | | | | | | | | | | |
|  | **n=254** | **n=334** | **n=159** | **n=413** | **n=304** | **n=182** | **n=313** | **n=252** | **n=94** | **n=348** | **n=305** |
| Mean score (SD) | 16.7 (6.2) | 16.9 (6.0) | 16.6 (5.8) | 17.9 (5.9) | 15.3 (6.0) | 17.8 (5.6) | 17.2 (5.8) | 15.6 (6.4) | 14.6 (6.7) | 16.6 (5.0) | 17.6 (6.7) |
| Impairment of QoL, n (%) |  |  |  |  |  |  |  |  |  |  |  |
| Mild (score 0–5) | 16 (6.3) | 8 (2.4) | 8 (5.0) | 14 (3.4) | 17 (5.6) | 4 (2.2) | 7 (2.2) | 21 (8.3) | 10 (10.6) | 9 (2.6) | 13 (4.3) |
| Moderate (score 6–10) | 19 (7.5) | 43 (12.9) | 9 (5.7) | 25 (6.1) | 44 (14.5) | 11 (6.0) | 31 (9.9) | 29 (11.5) | 13 (13.8) | 20 (5.7) | 38 (12.5) |
| Severe (score 11–30) | 219 (86.2) | 283 (84.7) | 142 (89.3) | 374 (90.6) | 243 (79.9) | 167 (91.8) | 275 (87.9) | 202 (80.2) | 51 (54.3) | 319 (91.7) | 254 (83.3) |
| **Day-to-day impact of AA, (score ≥6), n (%)b** | | | | | | | | | | | |
|  | **n=188** | **n=236** | **n=69** | **n=283** | **n=209** | **n=77** | **n=256** | **n=160** | **n=78** | **n=145** | **n=270** |
| Mental health/mood | 120 (63.8) | 126 (53.4) | 29 (42.0) | 179 (63.3) | 96 (46.0) | 51 (66.2) | 150 (58.6) | 74 (46.3) | 37 (47.4) | 56 (38.6) | 182 (67.4) |
| Ability to concentrate | 91 (48.4) | 118 (50.0) | 21 (30.4) | 147 (52.0) | 83 (39.7) | 45 (58.4) | 133 (52.0) | 52 (32.5) | 31 (39.7) | 52 (35.9) | 147 (54.4) |
| Sleep patterns | 97 (51.6) | 112 (47.5) | 26 (37.7) | 145 (51.3) | 90 (43.1) | 35 (45.5) | 132 (51.6) | 68 (42.5) | 33 (42.3) | 61 (42.1) | 141 (52.2) |
| Physical health | 100 (53.2) | 123 (52.1) | 28 (40.6) | 151 (53.4) | 99 (47.4) | 43 (55.8) | 138 (53.9) | 70 (43.8) | 39 (50.0) | 67 (46.2) | 145 (53.7) |
| Ability to exercise | 97 (51.6) | 114 (48.3) | 25 (36.2) | 152 (53.7) | 84 (40.2) | 46 (59.7) | 128 (50.0) | 62 (38.8) | 34 (43.6) | 58 (40.0) | 144 (53.3) |
| Cultural identity | 96 (51.1) | 113 (47.9) | 25 (36.2) | 155 (54.8) | 79 (37.8) | 46 (59.7) | 131 (51.2) | 57 (35.6) | 33 (42.3) | 63 (43.5) | 138 (51.1) |
| Religious identity | 76 (40.4) | 96 (40.7) | 22 (31.9) | 130 (46.0) | 64 (30.6) | 38 (49.4) | 108 (42.2) | 48 (30.0) | 26 (33.3) | 47 (32.4) | 121 (44.8) |
| Personal identity | 85 (45.2) | 111 (47.0) | 25 (36.2) | 150 (53.0) | 70 (33.5) | 46 (59.7) | 112 (43.8) | 63 (39.4) | 31 (39.7) | 59 (40.7) | 131 (48.5) |
| **Long-term impact of AAc, n (%)** | | | | | | | | | | | |
|  | **n=254** | **n=334** | **N=159** | **n=413** | **n=304** | **n=182** | **n=313** | **n=252** | **n=94** | **n=348** | **n=305** |
| My self-esteem has decreased | 93 (36.6) | 101 (30.2) | 52 (32.7) | 135 (32.7) | 100 (32.9) | 76 (41.8) | 102 (32.6) | 68 (27.0) | 34 (36.2) | 102 (29.3) | 110 (36.1) |
| My AA has negatively impacted my mental health | 79 (31.1) | 95 (28.4) | 36 (22.6) | 122 (29.5) | 78 (25.7) | 58 (31.9) | 80 (25.6) | 72 (28.6) | 26 (27.7) | 79 (22.7) | 105 (34.4) |
| My day-to-day activities have been negatively affected | 80 (31.5) | 83 (24.9) | 40 (25.2) | 123 (29.8) | 73 (24.0) | 54 (29.7) | 90 (28.8) | 59 (23.4) | 28 (29.8) | 72 (20.7) | 103 (33.8) |
| I have had to come to terms with the fact this is a long-term condition | 78 (30.7) | 64 (19.2) | 44 (27.7) | 114 (27.6) | 62 (20.4) | 54 (29.7) | 67 (21.4) | 65 (25.8) | 17 (18.1) | 73 (21.0) | 96 (31.5) |
| Has negatively impacted my physical health | 70 (27.6) | 75 (22.5) | 34 (21.4) | 107 (25.9) | 65 (21.4) | 56 (30.8) | 70 (22.4) | 53 (21.0) | 30 (31.9) | 73 (21.0) | 76 (24.9) |
| I have lost friends/or opportunities to socialize due to my AA | 45 (17.7) | 65 (19.5) | 30 (18.9) | 92 (22.3) | 39 (12.8) | 43 (23.6) | 60 (19.2) | 37 (14.7) | 15 (16.0) | 59 (17.0) | 66 (21.6) |
| At least one relationship with a partner has been negatively affected | 38 (15.0) | 57 (17.1) | 38 (23.9) | 79 (19.1) | 47 (15.5) | 37 (20.3) | 53 (16.9) | 43 (17.1) | 8 (8.5) | 67 (19.3) | 58 (19.0) |
| I have become a spokesperson/supporter for people living with AA | 31 (12.2) | 48 (14.4) | 49 (30.8) | 76 (18.4) | 47 (15.5) | 41 (22.5) | 50 (16.0) | 37 (14.7) | 7 (7.4) | 75 (21.6) | 46 (15.1) |
| My AA has negatively impacted my family and friends’ lives | 39 (15.4) | 54 (16.2) | 28 (17.6) | 73 (17.7) | 38 (12.5) | 48 (26.4) | 36 (11.5) | 37 (14.7) | 11 (11.7) | 60 (17.2) | 50 (16.4) |
| I have had suicidal thoughts because of my AA | 20 (7.9) | 32 (9.6) | 21 (13.2) | 47 (11.4) | 23 (7.6) | 13 (7.1) | 34 (10.9) | 26 (10.3) | 9 (9.6) | 39 (11.2) | 25 (8.2) |
| I have questioned whether to have children | 20 (7.9) | 21 (6.3) | 20 (12.6) | 43 (10.4) | 16 (5.3) | 13 (7.1) | 18 (5.8) | 30 (11.9) | 2 (2.1) | 39 (11.2) | 20 (6.6) |
| Other | 1 (0.4) | 1 (0.3) | 0 | 2 (0.5) | 0 | 0 | 0 | 2 (0.8) | 0 | 1 (0.3) | 1 (0.3) |
| My AA has not changed my life at all | 39 (15.4) | 87 (26.1) | 24 (15.1) | 84 (20.3) | 66 (21.7) | 10 (5.5) | 78 (24.9) | 62 (24.6) | 16 (17.0) | 60 (17.2) | 74 (24.3) |

**Notes:** aAll participants with current scalp hair loss <50% reported a previous scalp hair loss ≥50%. b n=493. cIn response to the question: “How, if at all, has your life changed as a result of your AA?” Multiple answers were possible.

Day-to-day impact scores on a 7-point scale (1–7, higher scores indicate greater impact).

**Abbreviations:** AA, alopecia areata; DLQI, Dermatology Life Quality Index; QoL, quality of life; SD, standard deviation.

**Table S4. Coping mechanisms in subgroups of adults with AA**

|  | **Current age (years)** | | | **Sex** | | **Duration since diagnosis (years)** | | | **Current scalp hair loss (%)a** | | |
| --- | --- | --- | --- | --- | --- | --- | --- | --- | --- | --- | --- |
| **≤40 n=254** | **41–50 n=334** | **>50**  **n=159** | **Female**  **n=413** | **Male**  **n=304** | **<2**  **n=182** | **2–4**  **n=313** | **>4**  **n=252** | **<50%**  **n=94** | **50–94%**  **n=348** | **≥95%**  **n=305** |
| **Coping mechanisms, n (%)b** | | | | | | | | | | | |
| Talking in person with a healthcare professional | 134 (52.8) | 178 (53.3) | 73 (45.9) | 204 (49.4) | 163 (53.6) | 108 (59.3) | 164 (52.4) | 113 (44.8) | 40 (42.6) | 155 (44.5) | 190 (62.3) |
| Doing exercise or sport | 138 (54.3) | 141 (42.2) | 54 (34.0) | 184 (44.6) | 134 (44.1) | 95 (52.2) | 143 (45.7) | 95 (37.7) | 38 (40.4) | 133 (38.2) | 162 (53.1) |
| Talking on online with other people with AA | 94 (37.0) | 159 (47.6) | 64 (40.3) | 182 (44.1) | 123 (40.5) | 84 (46.2) | 134 (42.8) | 99 (39.3) | 30 (31.9) | 144 (41.4) | 143 (46.9) |
| Talking in person with other people with AA | 99 (39.0) | 132 (39.5) | 81 (50.9) | 202 (48.9) | 99 (32.6) | 81 (44.5) | 164 (52.4) | 67 (26.6) | 24 (25.5) | 136 (39.1) | 152 (49.8) |
| Talking to friends and family | 98 (38.6) | 116 (34.7) | 39 (24.5) | 163 (39.5) | 74 (24.3) | 82 (45.1) | 110 (35.1) | 61 (24.2) | 25 (26.6) | 91 (26.2) | 137 (44.9) |
| Using social media channelsc | 74 (29.1) | 109 (32.6) | 39 (24.5) | 131 (31.7) | 82 (27.0) | 48 (26.4) | 112 (35.8) | 62 (24.6) | 29 (30.9) | 89 (25.6) | 104 (34.1) |
| Doing more religious activities | 61 (24.0) | 45 (13.5) | 26 (16.4) | 86 (20.8) | 42 (13.8) | 38 (20.9) | 54 (17.3) | 40 (15.9) | 16 (17.0) | 50 (14.4) | 66 (21.6) |
| Wearing wigs | 34 (13.4) | 49 (14.7) | 27 (17.0) | 73 (17.7) | 35 (11.5) | 36 (19.8) | 41 (13.1) | 33 (13.1) | 17 (18.1) | 37 (10.6) | 56 (18.4) |
| Patient organizations | 42 (16.5) | 24 (7.2) | 16 (10.1) | 60 (14.5) | 19 (6.3) | 25 (13.7) | 34 (10.9) | 23 (9.1) | 11 (11.7) | 24 (6.9) | 47 (15.4) |
| Experimenting with make up | 16 (6.3) | 28 (8.4) | 15 (9.4) | 45 (10.9) | 13 (4.3) | 15 (8.2) | 31 (9.9) | 13 (5.2) | 10 (10.6) | 18 (5.2) | 31 (10.2) |
| Increasing my alcohol consumption | 16 (6.3) | 9 (2.7) | 16 (10.1) | 30 (7.3) | 8 (2.6) | 6 (3.3) | 9 (2.9) | 26 (10.3) | 7 (7.5) | 26 (7.5) | 8 (2.6) |
| Using food as comfort | 7 (2.8) | 19 (5.7) | 9 (5.7) | 20 (4.8) | 14 (4.6) | 7 (3.9) | 13 (4.2) | 15 (6.0) | 11 (11.7) | 15 (4.3) | 9 (3.0) |
| Increasing my smoking | 14 (5.5) | 10 (3.0) | 8 (5.0) | 21 (5.1) | 10 (3.3) | 6 (3.3) | 4 (1.3) | 22 (8.7) | 4 (4.3) | 22 (6.3) | 6 (2.0) |
| Hiding myself away from the world | 8 (3.2) | 10 (3.0) | 10 (6.3) | 19 (4.6) | 7 (2.3) | 6 (3.3) | 3 (1.0) | 19 (7.5) | 3 (3.2) | 19 (5.5) | 6 (2.0) |
| Avoiding exercise or sport | 5 (2.0) | 13 (3.9) | 5 (3.1) | 13 (3.2) | 9 (3.0) | 7 (3.9) | 9 (2.9) | 7 (2.8) | 9 (9.6) | 10 (2.9) | 4 (1.3) |
| Hair loss concealers | 6 (2.4) | 10 (3.0) | 5 (3.1) | 15 (3.6) | 6 (2.0) | 5 (2.8) | 11 (3.5) | 5 (2.0) | 4 (4.3) | 10 (2.9) | 7 (2.3) |
| Acquiring prescription medicines without prescription | 2 (0.8) | 9 (2.7) | 5 (3.1) | 9 (2.2) | 4 (1.3) | 8 (4.4) | 2 (0.6) | 6 (2.4) | 2 (2.1) | 8 (2.3) | 6 (2.0) |
| Increased use of recreational drugs | 7 (2.8) | 8 (2.4) | 0 (0.0) | 7 (1.7) | 8 (2.6) | 3 (1.7) | 5 (1.6) | 7 (2.8) | 4 (4.3) | 4 (1.2) | 7 (2.3) |
| I don’t currently use any coping of compensatory strategies for my AA | 16 (6.3) | 15 (4.5) | 7 (4.4) | 17 (4.1) | 21 (6.9) | 1 (0.6) | 11 (3.5) | 26 (10.3) | 5 (5.3) | 26 (7.5) | 7 (2.3) |

**Notes:** aAll participants with current scalp hair loss <50% reported a previous scalp hair loss ≥50%. bIn response to the survey question: “Thinking about your AA in the last 6 months please select what is helping you cope with your AA.” Multiple answers were possible. ce.g., Facebook, YouTube, Twitter, etc. In China, e.g., WeChat, Red Book, Weibo, Zhi Hu etc.

**Abbreviation:** AA, alopecia areata.

**Table S5. Knowledge needs in subgroups of adults with AA**

|  | **Current age (years)** | | | **Sex** | | **Duration since diagnosis (years)** | | | **Current scalp hair loss (%)a** | | |
| --- | --- | --- | --- | --- | --- | --- | --- | --- | --- | --- | --- |
| **≤40 n=254** | **41–50 n=334** | **>50**  **n=159** | **Female**  **n=413** | **Male**  **n=304** | **<2**  **n=182** | **2–4**  **n=313** | **>4**  **n=252** | **<50%**  **n=94** | **50–94%**  **n=348** | **≥95%**  **n=305** |
| **Information needs, n (%)** | | | | | | | | | | | |
| Realistic treatment result expectations | 108 (42.5) | 125 (37.4) | 59 (37.1) | 175 (42.4) | 108 (35.5) | 71 (39.0) | 117 (37.4) | 104 (41.3) | 28 (29.8) | 129 (37.1) | 135 (44.3) |
| AA and mental health | 97 (38.2) | 129 (38.6) | 54 (34.0) | 164 (39.7) | 102 (33.6) | 83 (45.6) | 112 (35.8) | 85 (33.7) | 27 (28.7) | 121 (34.8) | 132 (43.3) |
| AA treatment optionsb | 94 (37.0) | 111 (33.2) | 49 (30.8) | 143 (34.6) | 100 (32.9) | 67 (36.8) | 100 (32.0) | 87 (34.5) | 32 (34.0) | 91 (26.2) | 131 (43.0) |
| In-person support groups | 86 (33.9) | 111 (33.2) | 47 (29.6) | 143 (34.6) | 92 (30.3) | 62 (34.1) | 107 (34.2) | 75 (29.8) | 27 (28.7) | 88 (25.3) | 129 (42.3) |
| Risk/benefits of different treatments | 87 (34.3) | 96 (28.7) | 49 (30.8) | 149 (36.1) | 80 (26.3) | 49 (26.9) | 104 (33.2) | 79 (31.4) | 29 (30.9) | 92 (26.4) | 111 (36.4) |
| Online support groups/forums | 76 (29.9) | 107 (32.0) | 48 (30.2) | 142 (34.4) | 81 (26.6) | 53 (29.1) | 100 (32.0) | 78 (31.0) | 25 (26.6) | 97 (27.9) | 109 (35.7) |
| AA interventionsc | 87 (34.3) | 86 (25.8) | 42 (26.4) | 122 (29.5) | 78 (25.7) | 64 (35.2) | 83 (26.5) | 68 (27.0) | 17 (18.1) | 85 (24.4) | 113 (37.1) |
| AA-related conditionsd | 66 (26.0) | 84 (25.2) | 46 (28.9) | 109 (26.4) | 78 (25.7) | 49 (26.9) | 78 (24.9) | 69 (27.4) | 13 (13.8) | 86 (24.7) | 97 (31.8) |
| Other | 0 (0) | 2 (0.6) | 0 (0) | 1 (0.2) | 1 (0.3) | 0 (0) | 0 (0) | 2 (0.8) | 0 | 1 (0.3) | 1 (0.3) |
| I do not wish for any additional information or support regarding my AA | 19 (7.5) | 27 (8.1) | 32 (20.1) | 53 (12.8) | 25 (8.2) | 7 (3.9) | 40 (12.8) | 31 (12.3) | 12 (12.8) | 55 (15.8) | 11 (3.6) |

**Notes:** aAll participants with current scalp hair loss <50% reported a previous scalp hair loss ≥50%. b Prescription-based. ce.g., alternative therapies, diet-related changes. de.g., depression.

**Abbreviation:** AA, alopecia areata.
